# Supplementary material
Source: PubMed Central journal article supplement (PMC4220494)
Supplement: ncomms6283-s1.pdf [file ncomms6283-s1.pdf]

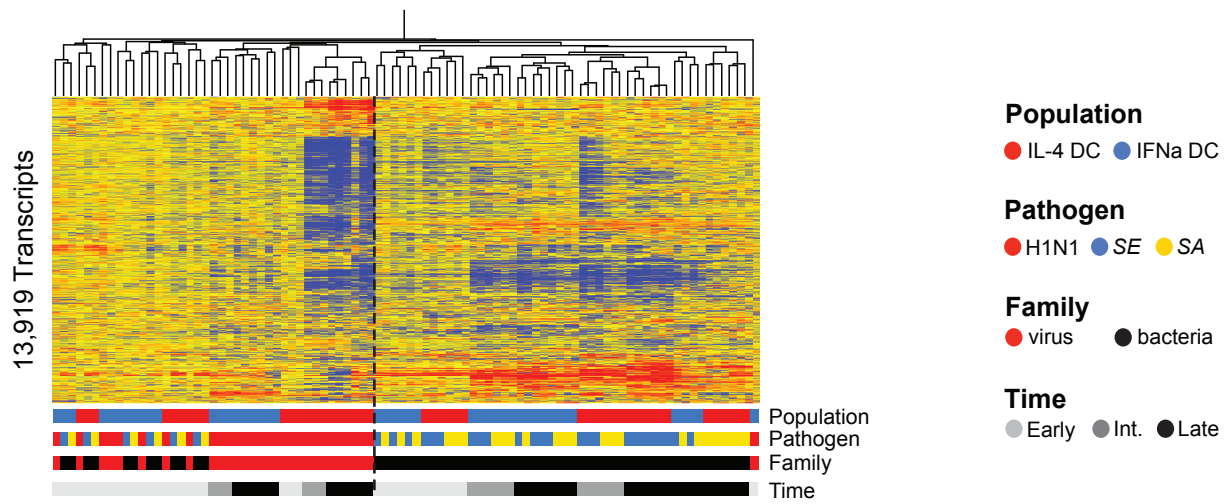

**Supplementary Figure 1** - Hierarchical clustering of samples according to the expression of the 13,919 transcripts modulated in IFN $\alpha$  and IL-4 DC stimulated with pathogens, colored by DC population, pathogen, pathogen family or time (early: 1h, 2h; intermediate: 6h; late: 12h, 24h).

### 1) Reference dataset: 120 Samples

4 stimuli, 2 cell populations, 5 time points, 3 donors  
 HT12v4: 47,234 transcripts per sample

### 2) Minimum Scaling Normalization

Each probe with raw data less than 10 is set to 10  
 Removes noise created by low values

### 3) Normalization

Each sample normalized to its own donor's cRPM expression,  
 by cell population and by time point

### 4) Dataset Split

Groups are organized by stimulus, cell population and time point,  
 creating 40 groups with 3 biological replicates per group (3 donors)

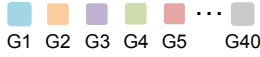

### 5) Score Assignment per Probe

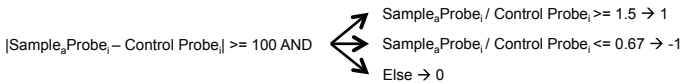

### 6) Probe Score Assignment per Group

A probe scores 1 for a group if all 3 biological replicates for that stimulus score 1, -1 if all biological replicates for that stimulus score -1, else 0  
 Filter out probes that display no change (score 0 in all groups) → **6,382 probes left**

### 7) Probes Cluster Identification Within Groups

Probes only cluster if the pattern -1/0/1 across all 3 donors is a perfect match

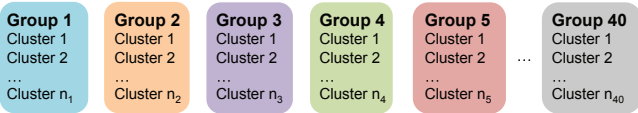

### 8) Define weighted co-cluster matrix

Weight = Number of times probe<sub>i</sub> and probe<sub>j</sub> are in the same cluster

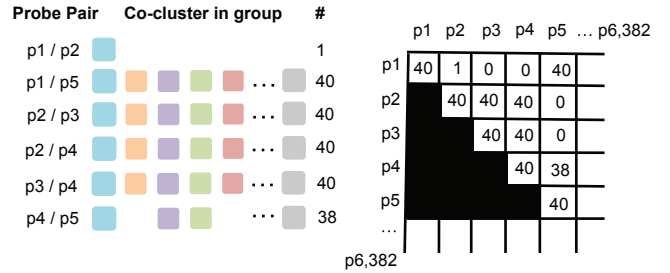

### 9) Build unweighted graph

Loop 1 → Edges represented >=40  
 Loop 2 → Edges represented >=39  
 Loop 3 → Edges represented >=38  
 ...  
 Loop 40 → Edges represented >=1

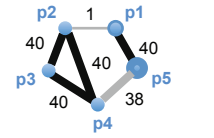

### 10) Identify cliques

A clique is a group of probes all connected by the weight number for the loop considered. In loop 1 → 40, in loop 2 → 39 or 40, etc... Cliques containing 15 or more members are retained as modules and probes cleared out for following loops. The largest clique is retained first (e.g., M1.1 in loop 1). The probes are then removed, the unweighted graph is redrawn and the next clique is identified. When no more cliques are found in M1, the threshold gets lowered and the M2 loop starts.

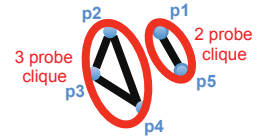

### 11) Lay out module grid

The algorithm identified 204 modules containing 6,278 transcripts combined. The modules are organized into a grid, with loop number in rows and clique number in columns. If there are more than 20 cliques for a loop, they are represented on the following row, which has the same loop number.

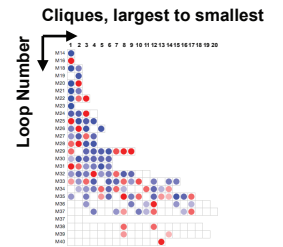

Supplementary Figure 2 - Module construction algorithm

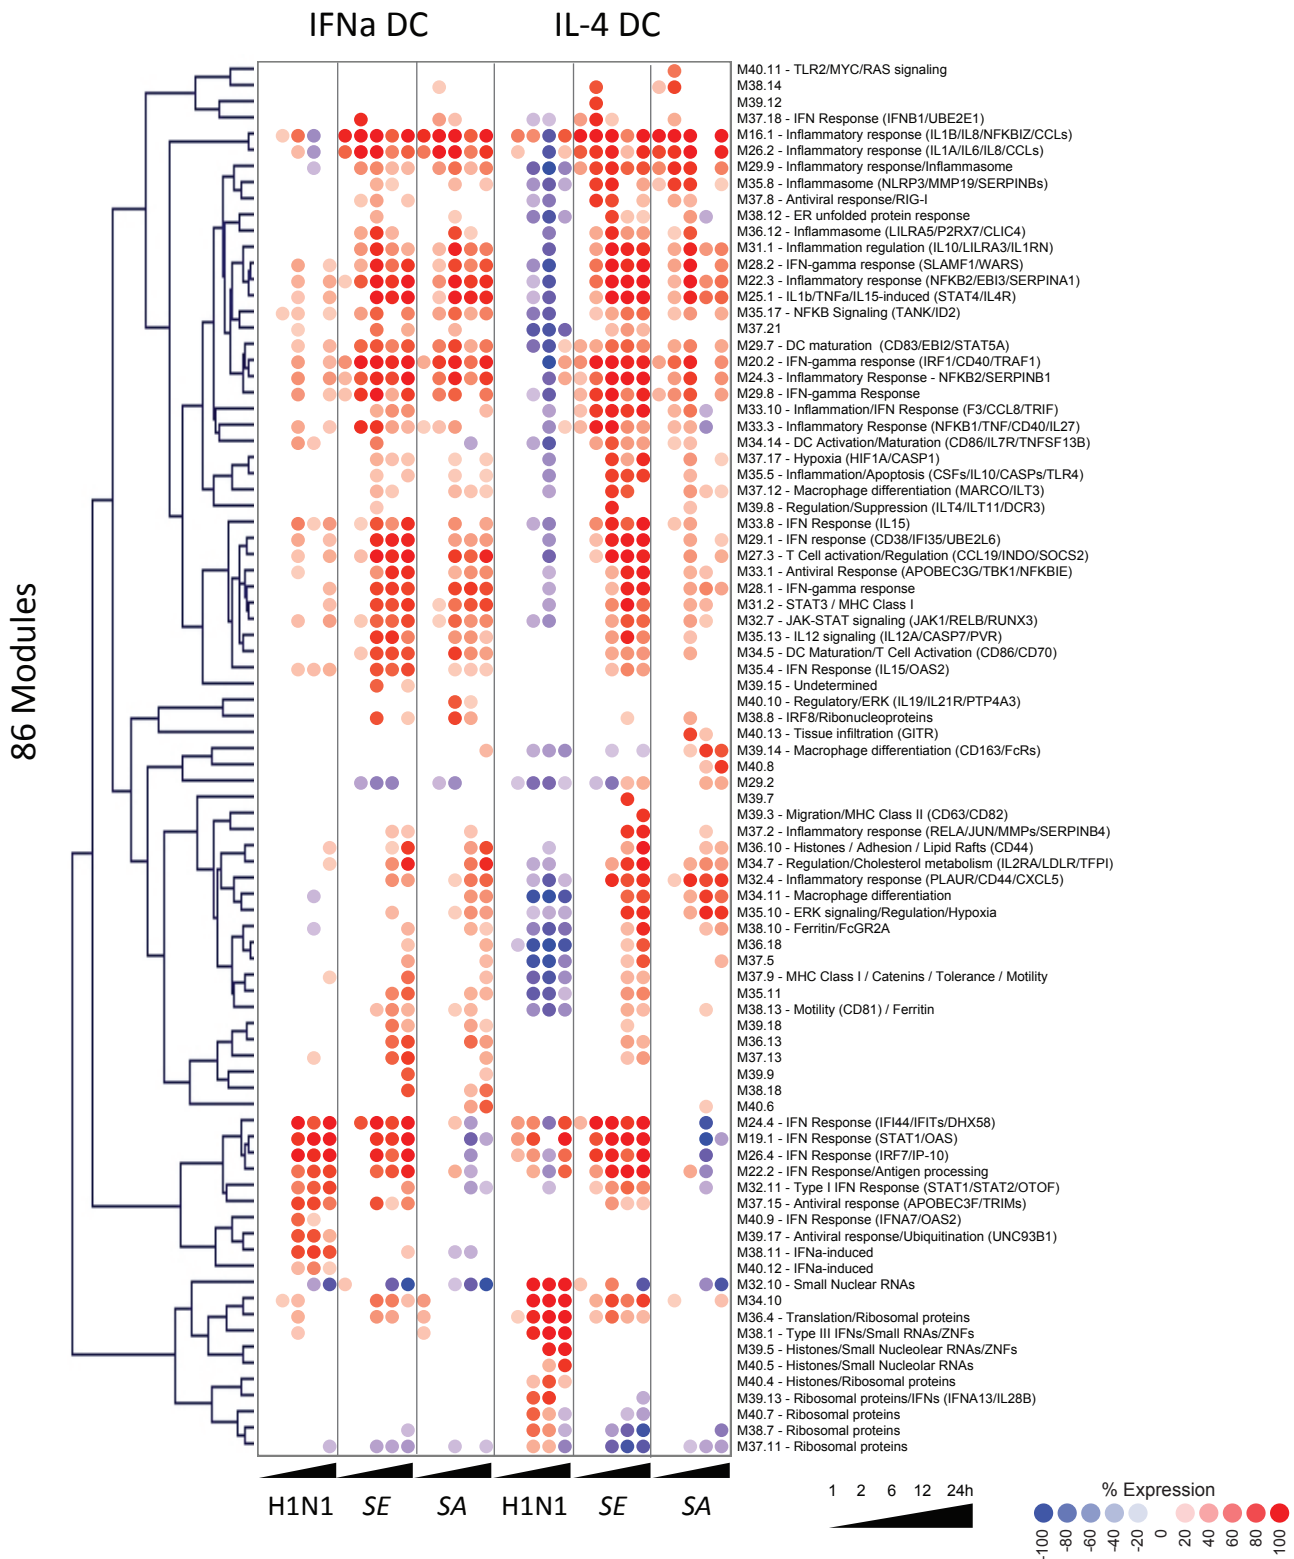

**Supplementary Figure 3** - Heatmap representing the 86 modules overexpressed at least once ( $\geq 40\%$ ) in DC in response to pathogen challenge. Modules are hierarchically clustered (Pearson correlation). (H1N1: Influenza H1N1 Brisbane, SE: Heat-killed *S. enterica*, SA: Heat-killed *S. aureus*)

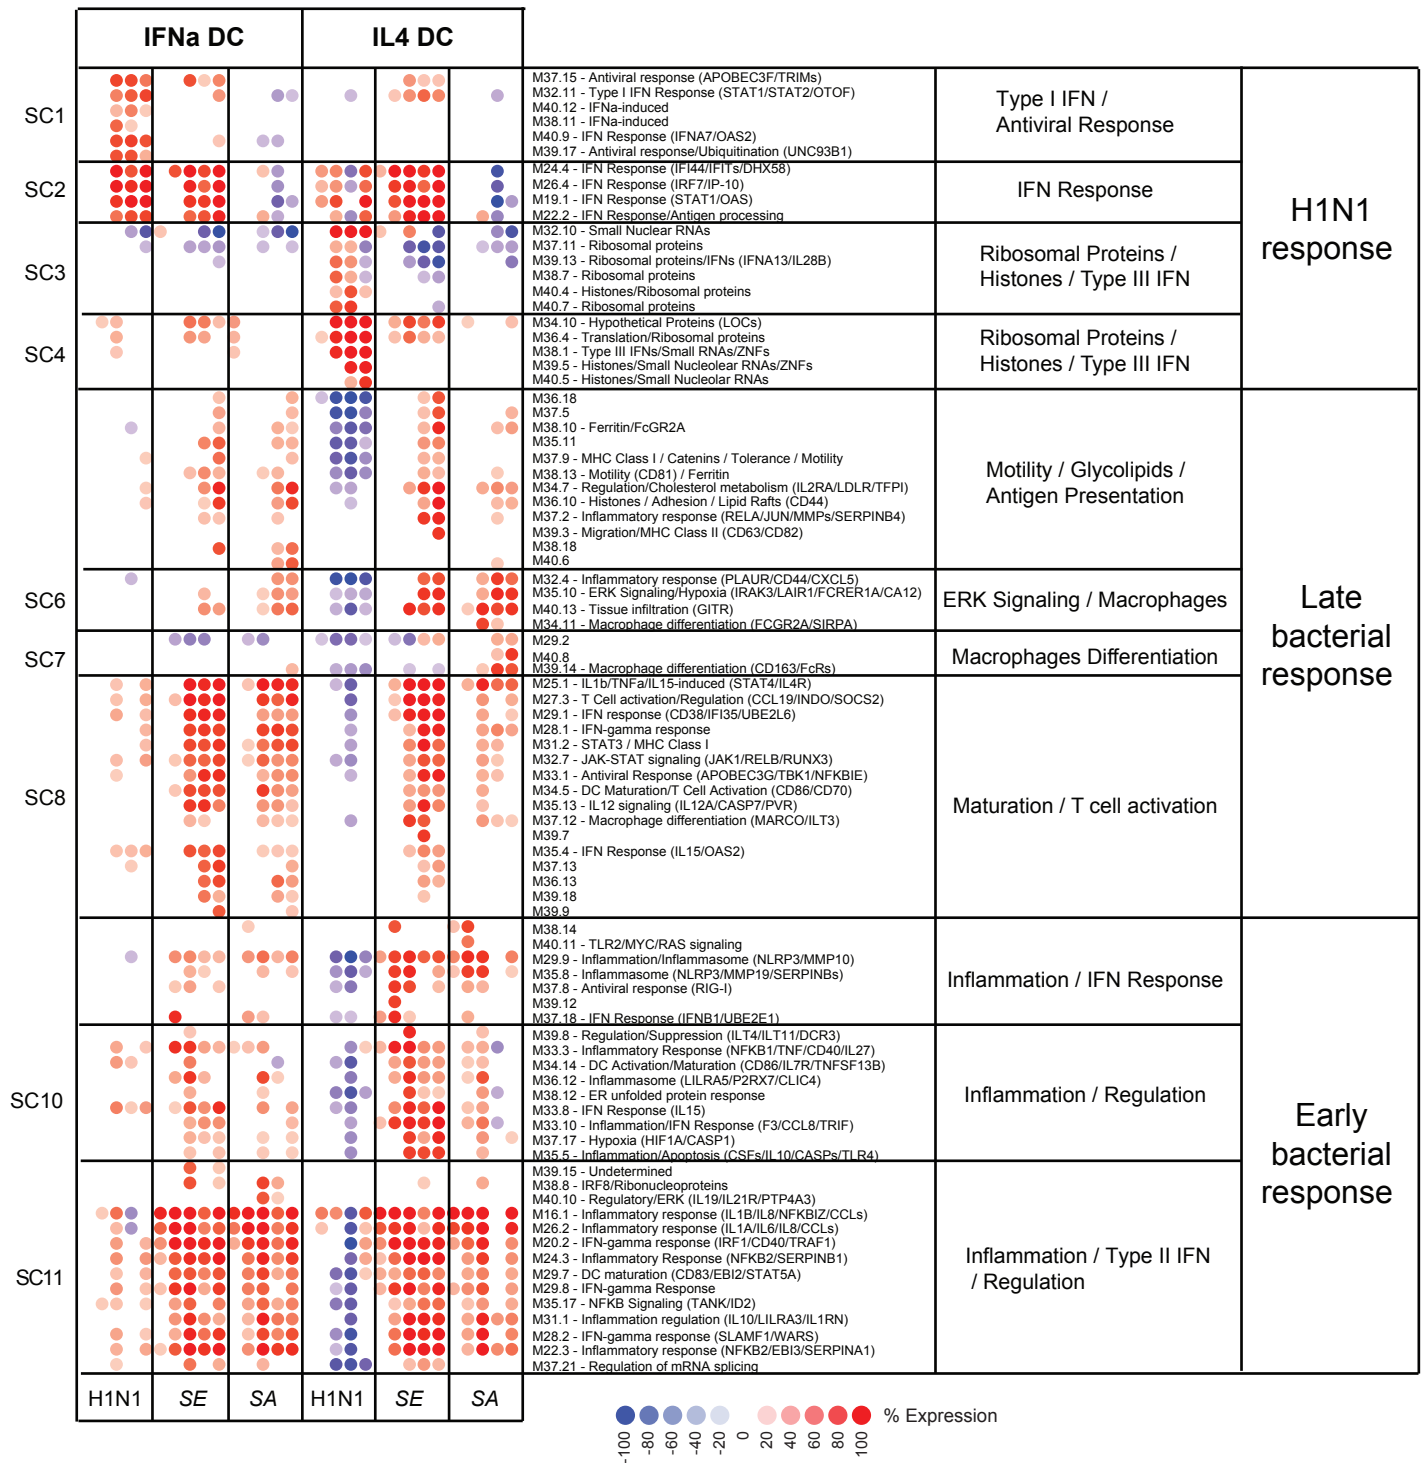

**Supplementary Figure 4** - SOTA analysis identifies 11 module clusters defining the breadth of the modular transcriptional response of APC to H1N1, *S. enterica* and *S. aureus* in vitro over time. (H1N1: Influenza H1N1 Brisbane, SE: Heat-killed *S. enterica*, SA: Heat-killed *S. aureus*, SC: SOTA Cluster)

**SC1: Interferon response**  
(IFNa DC - H1N1 - 6h)

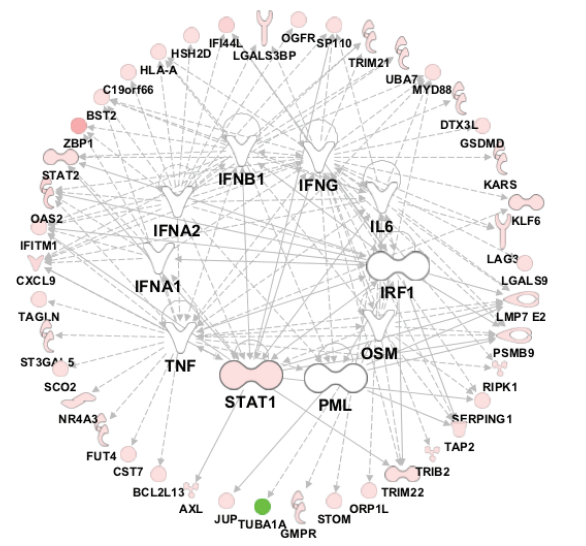

**SC2: Interferon response**  
(IFNa DC - *S. enterica* - 6h)

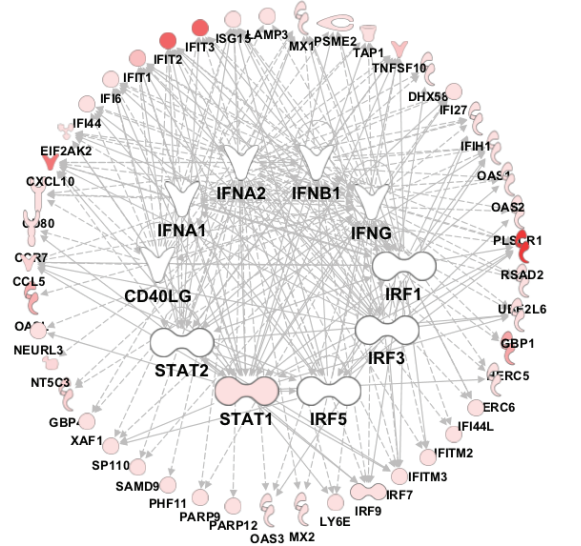

**SC3: Ribosomal Proteins / Histones**  
(IL-4 DC - H1N1 - 6h)

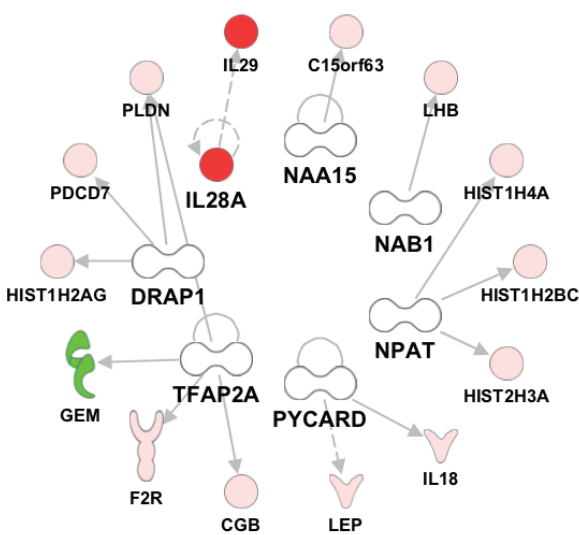

**SC4: Histones / Type III IFN**  
(IL-4 DC - H1N1 - 6h)

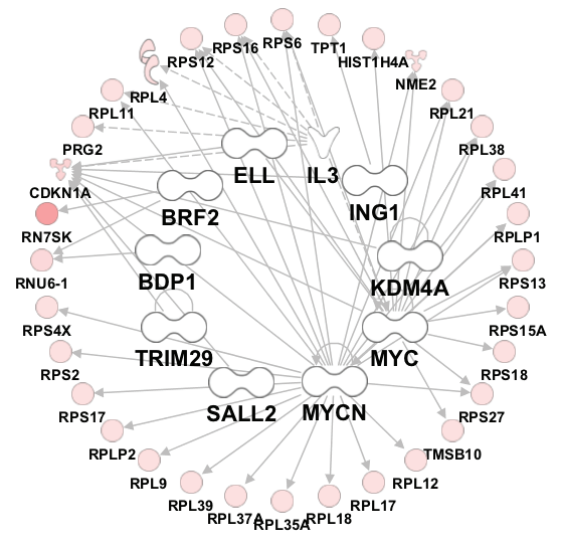

**SC5: Motility / Glycolipids / Antigen Presentation**  
(IFNa DC - *S. enterica* - 24h)

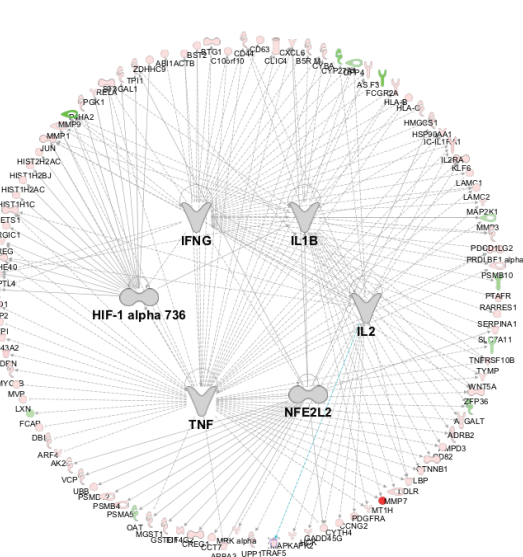

**SC6: ERK Signaling / Macrophages**  
(IL-4 DC - *S. aureus* - 6h)

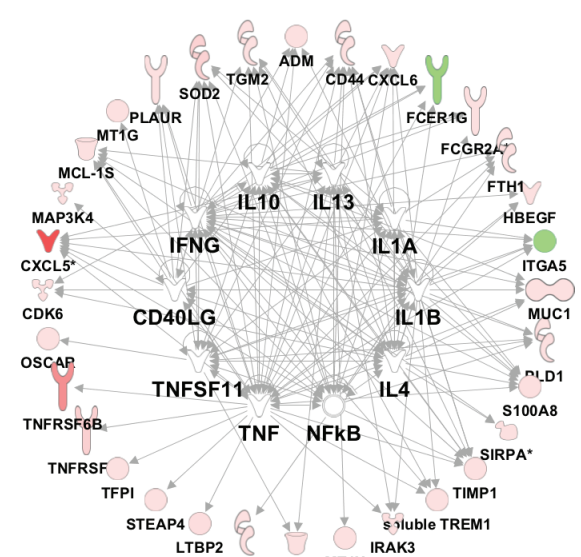

### SC7: Macrophages Differentiation

(IL-4 DC – *S. aureus* - 24h)

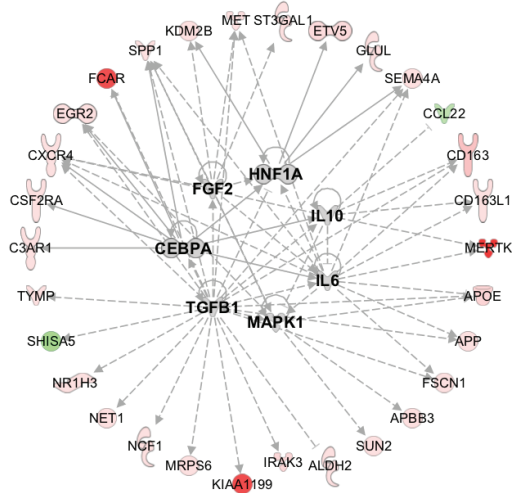

### SC8: Maturation / T Cell Activation

(IFNα DC - *S. enterica* - 24h)

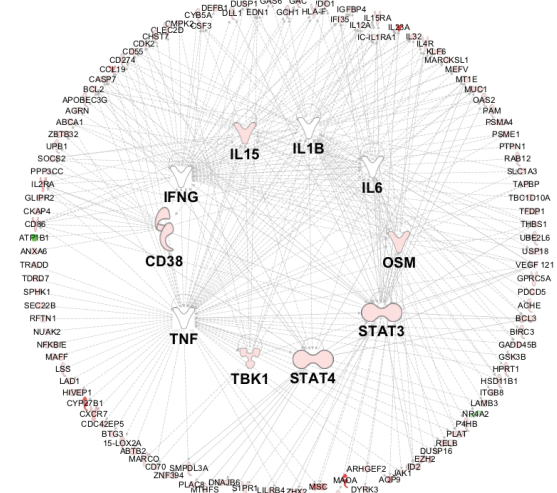

### SC9: Inflammation / IFN Response

(IL-4 DC - *S. enterica* - 6h)

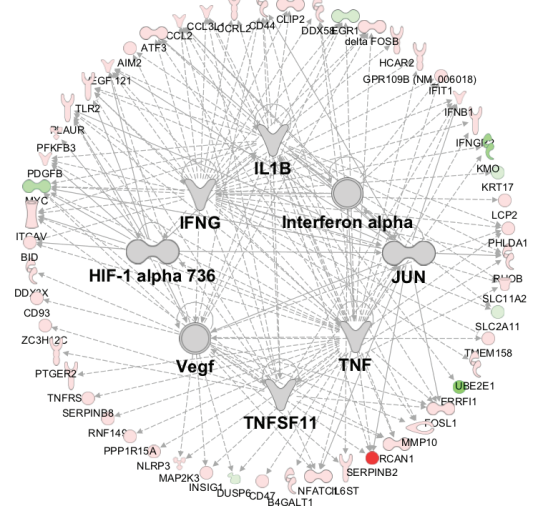

### SC10: Inflammation / Regulation

(IL-4 DC - *S. enterica* - 6h)

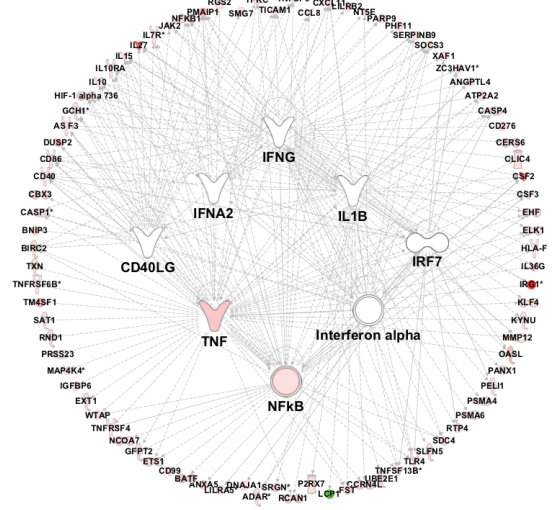

### SC11: Inflammation / Regulation

(IFNα DC - *S. enterica* - 6h)

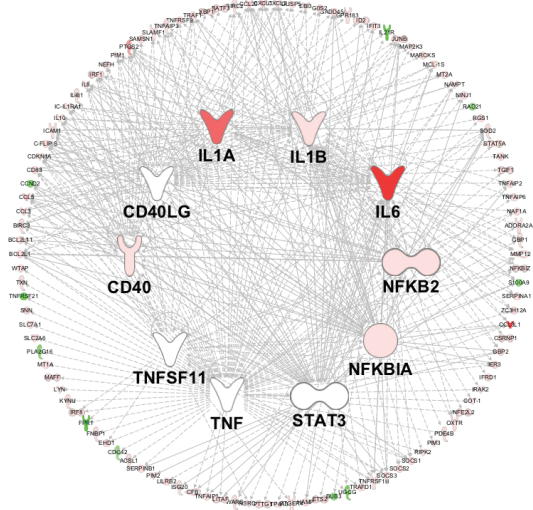

**Supplementary Figure 5 - Ingenuity pathway analysis of the 11 clusters of modules identified by SOTA analysis.** The molecules are colored according to their expression in the cell population, pathogen and time point specified in parentheses. The molecules in the center represent the in silico-predicted cytokines and transcriptional regulators up or downstream of the module transcripts.

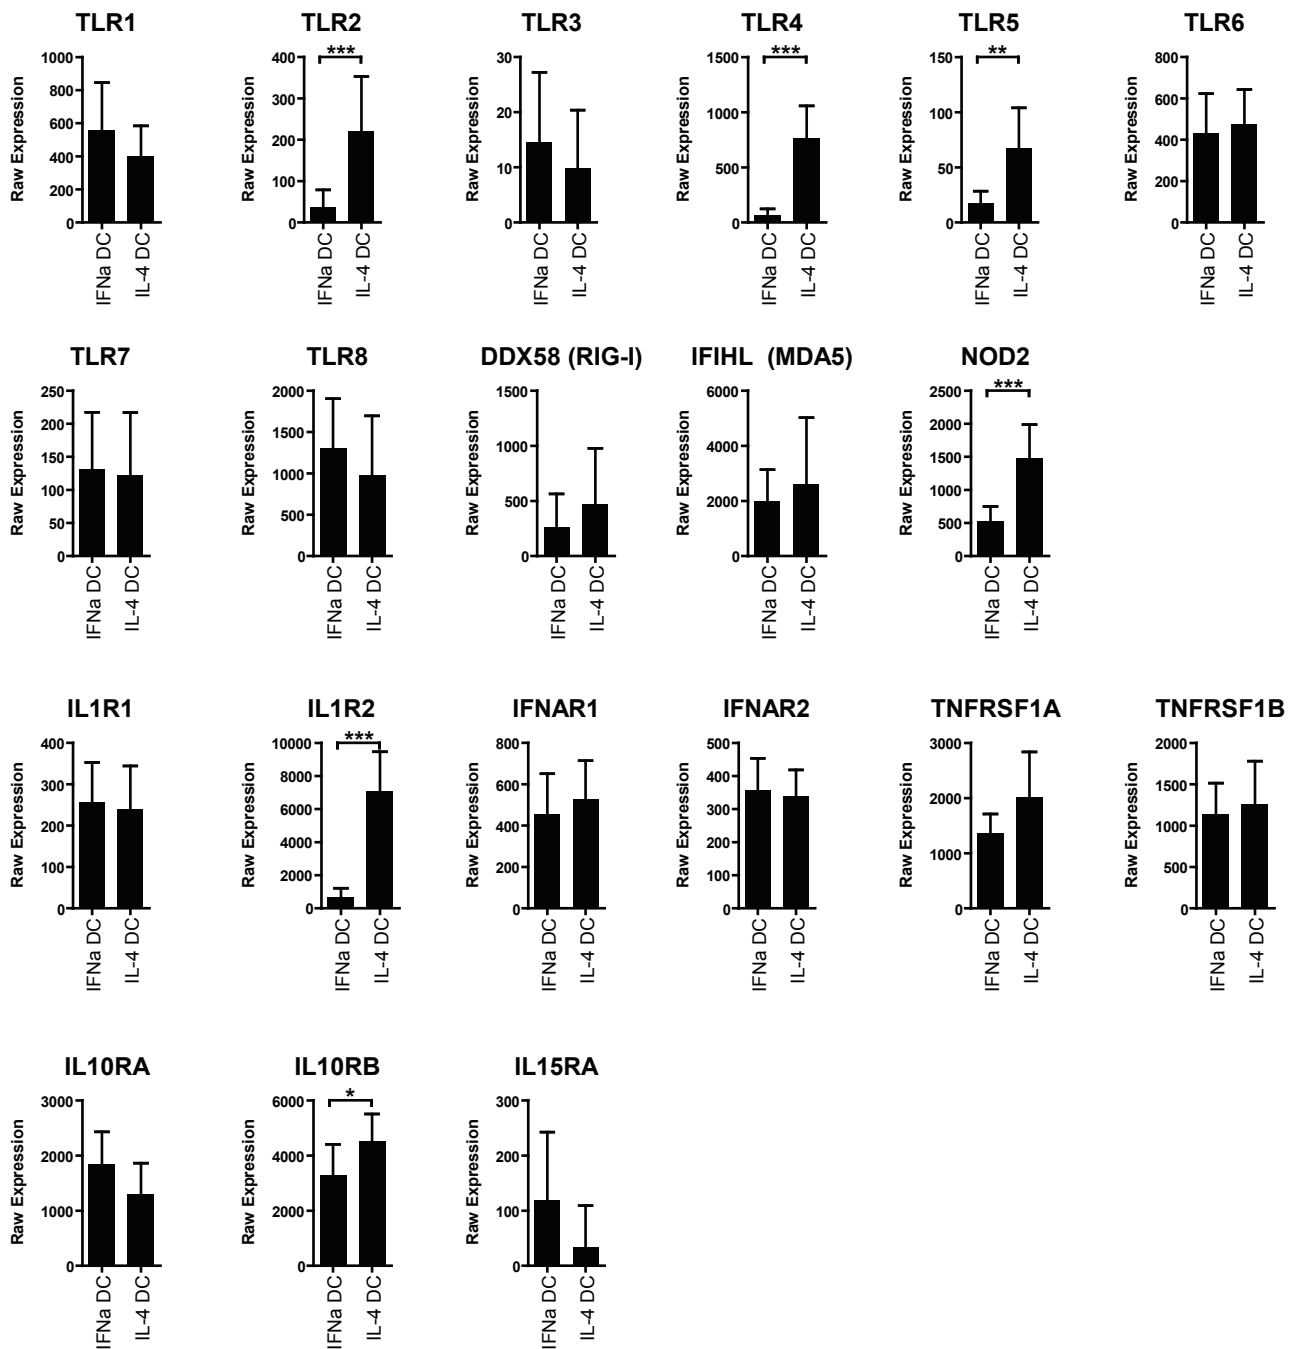

**Supplementary Figure 6** - Analysis of transcriptional expression of PRRs and cytokine receptors in IFN $\alpha$  and IL-4 DC at baseline (6h in media alone). Raw data is displayed. Columns represent the mean of 9 biological replicates (9 independent donors). Error bars represent the standard deviation.

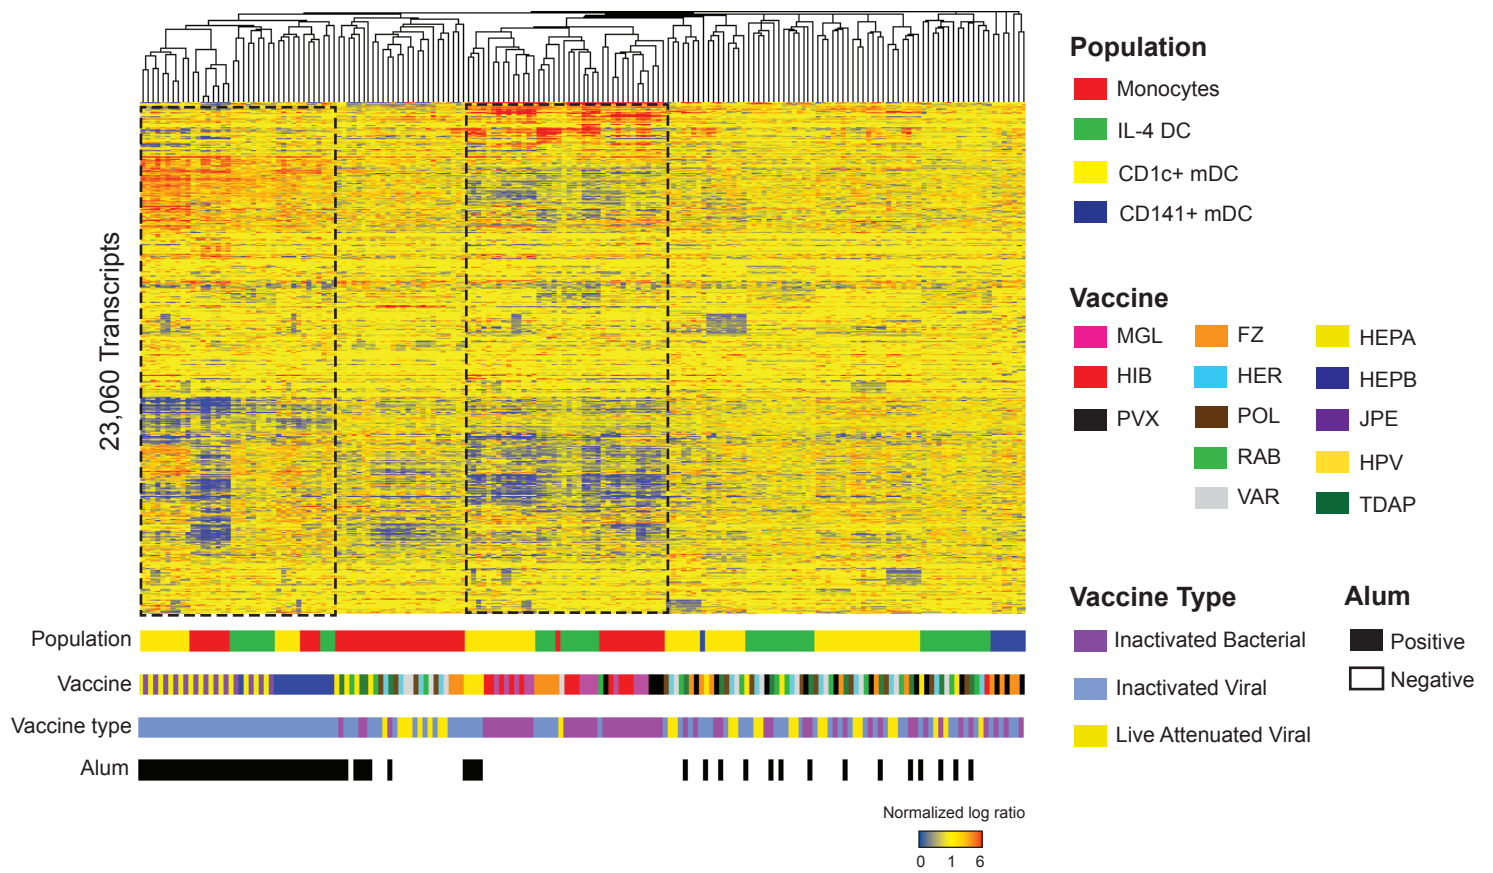

**Supplementary Figure 7** - Unsupervised hierarchical clustering (Pearson correlation) of the 23,060 transcripts detected in monocytes, IL-4 DC, CD1c+ and CD141+ mDC stimulated with 13 vaccines for 6h. Samples are colored by cell population, vaccine, vaccine type and alum content.



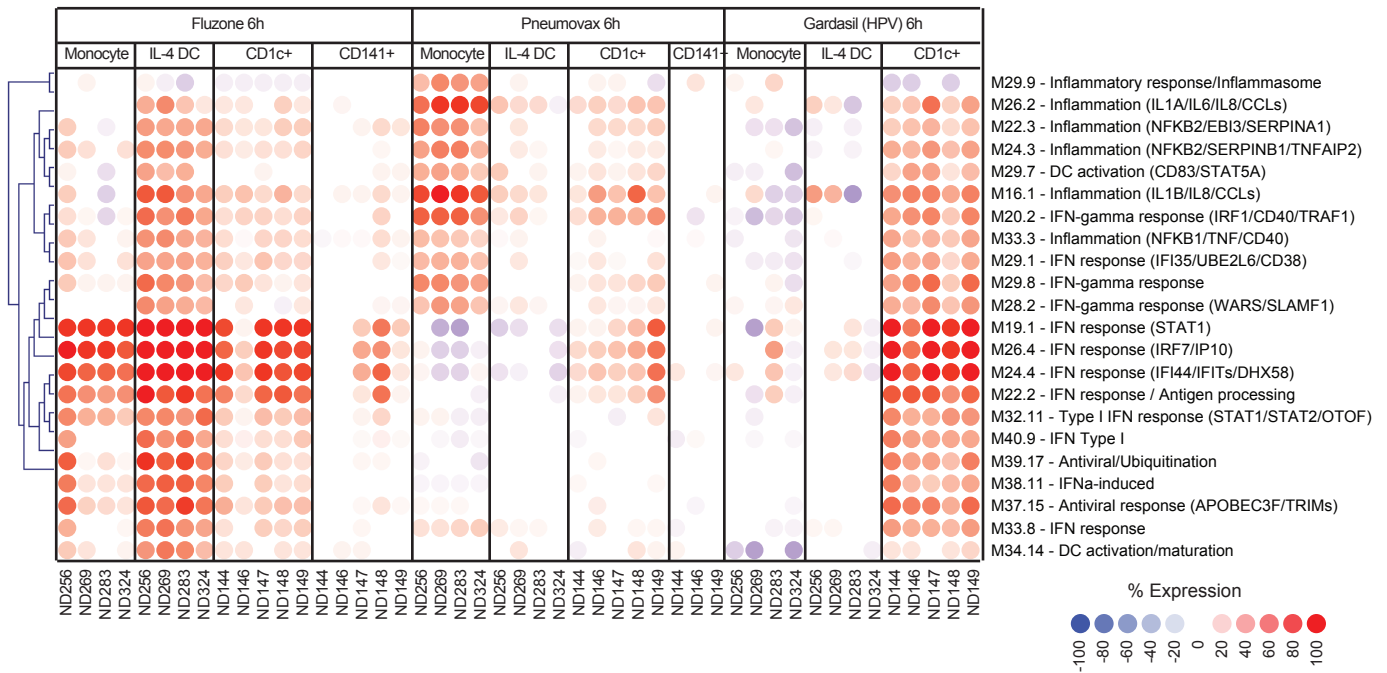

**Supplementary Figure 8** - Individual modular fingerprints of monocytes, IL-4 DC, CD1c+ and CD141+ mDC in response to 6h activation with Fluzone (influenza), Pneumovax (pneumococcus) or Gardasil (HPV).

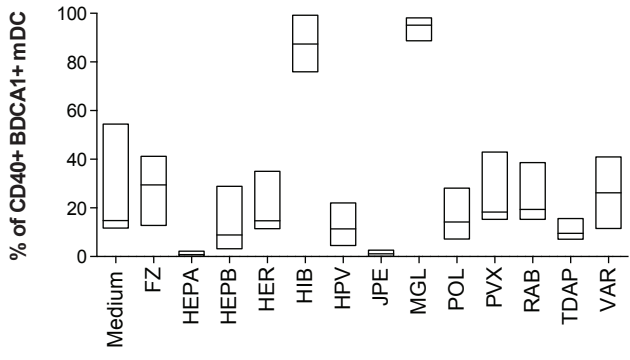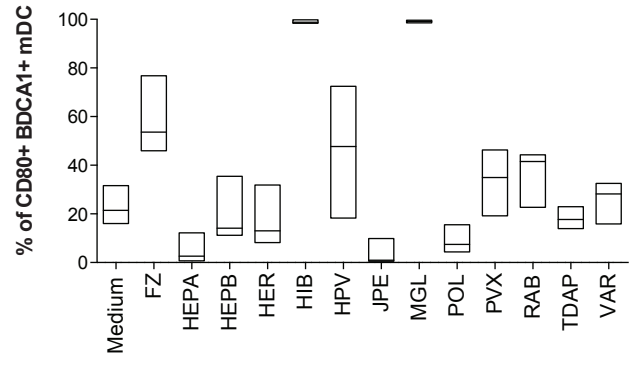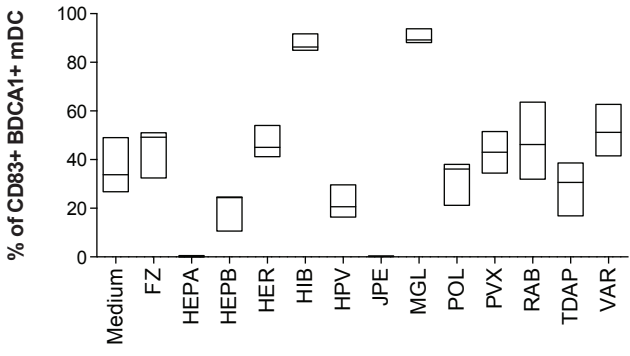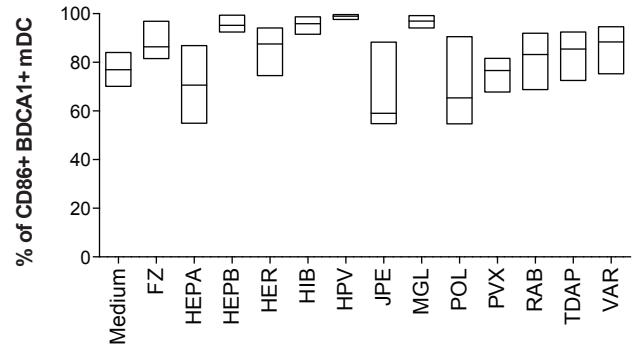

**Supplementary Figure 9** - Expression of CD40, CD80, CD83, and CD86 on CD1c+ mDC after 24h stimulation with vaccines in vitro. Floating bars (min to max, line at median) representing the percent of live CD1c+ mDC positive for CD40, CD80, CD83 and CD86.

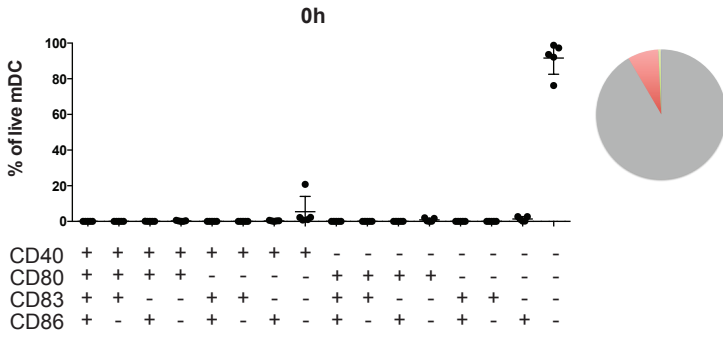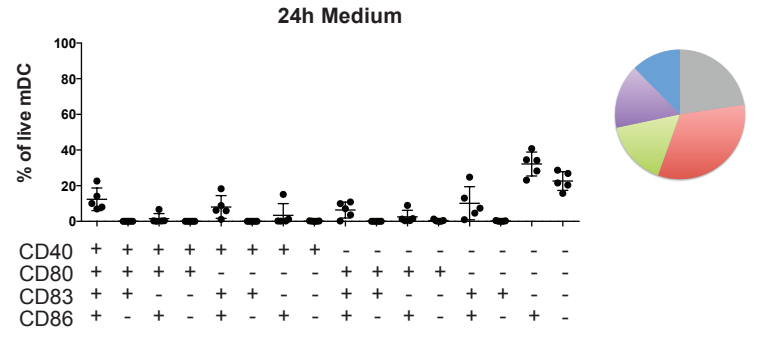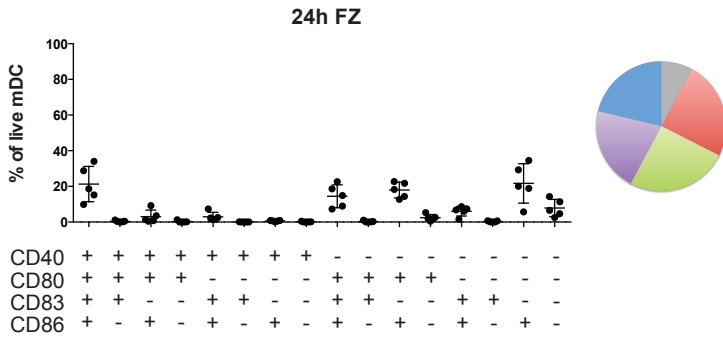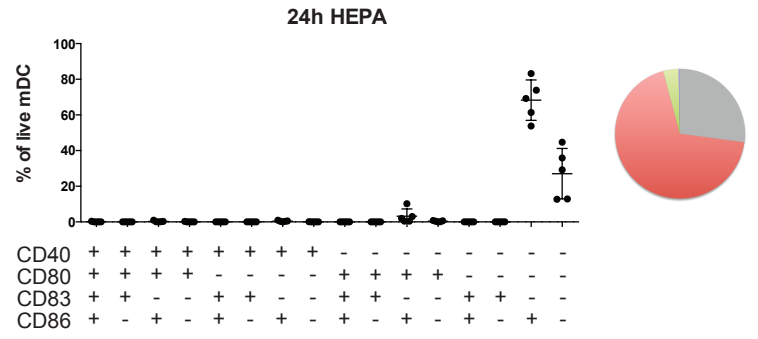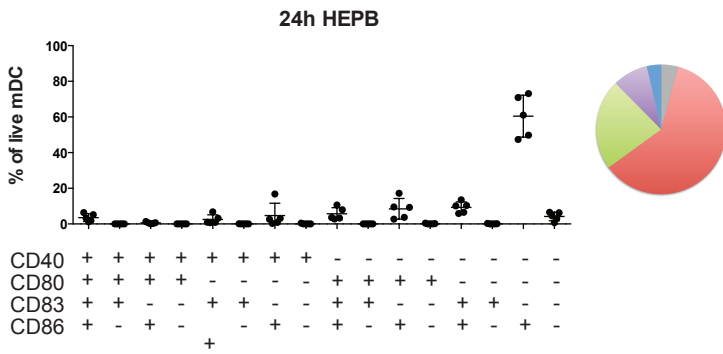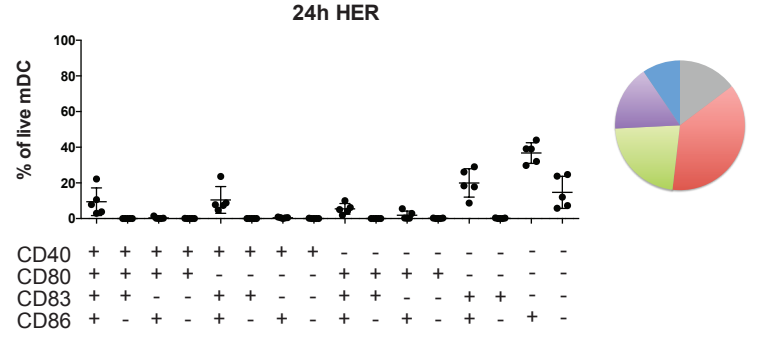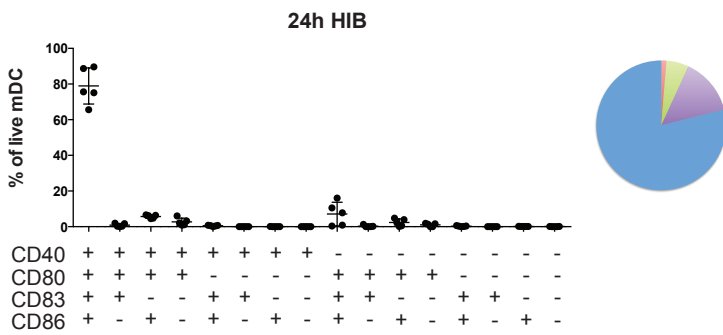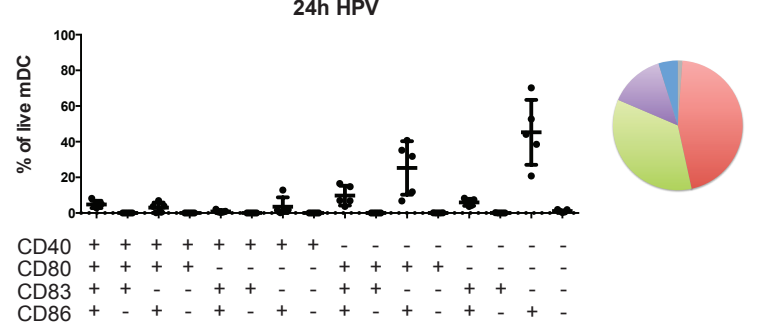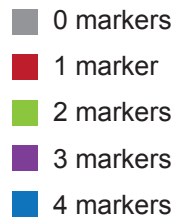

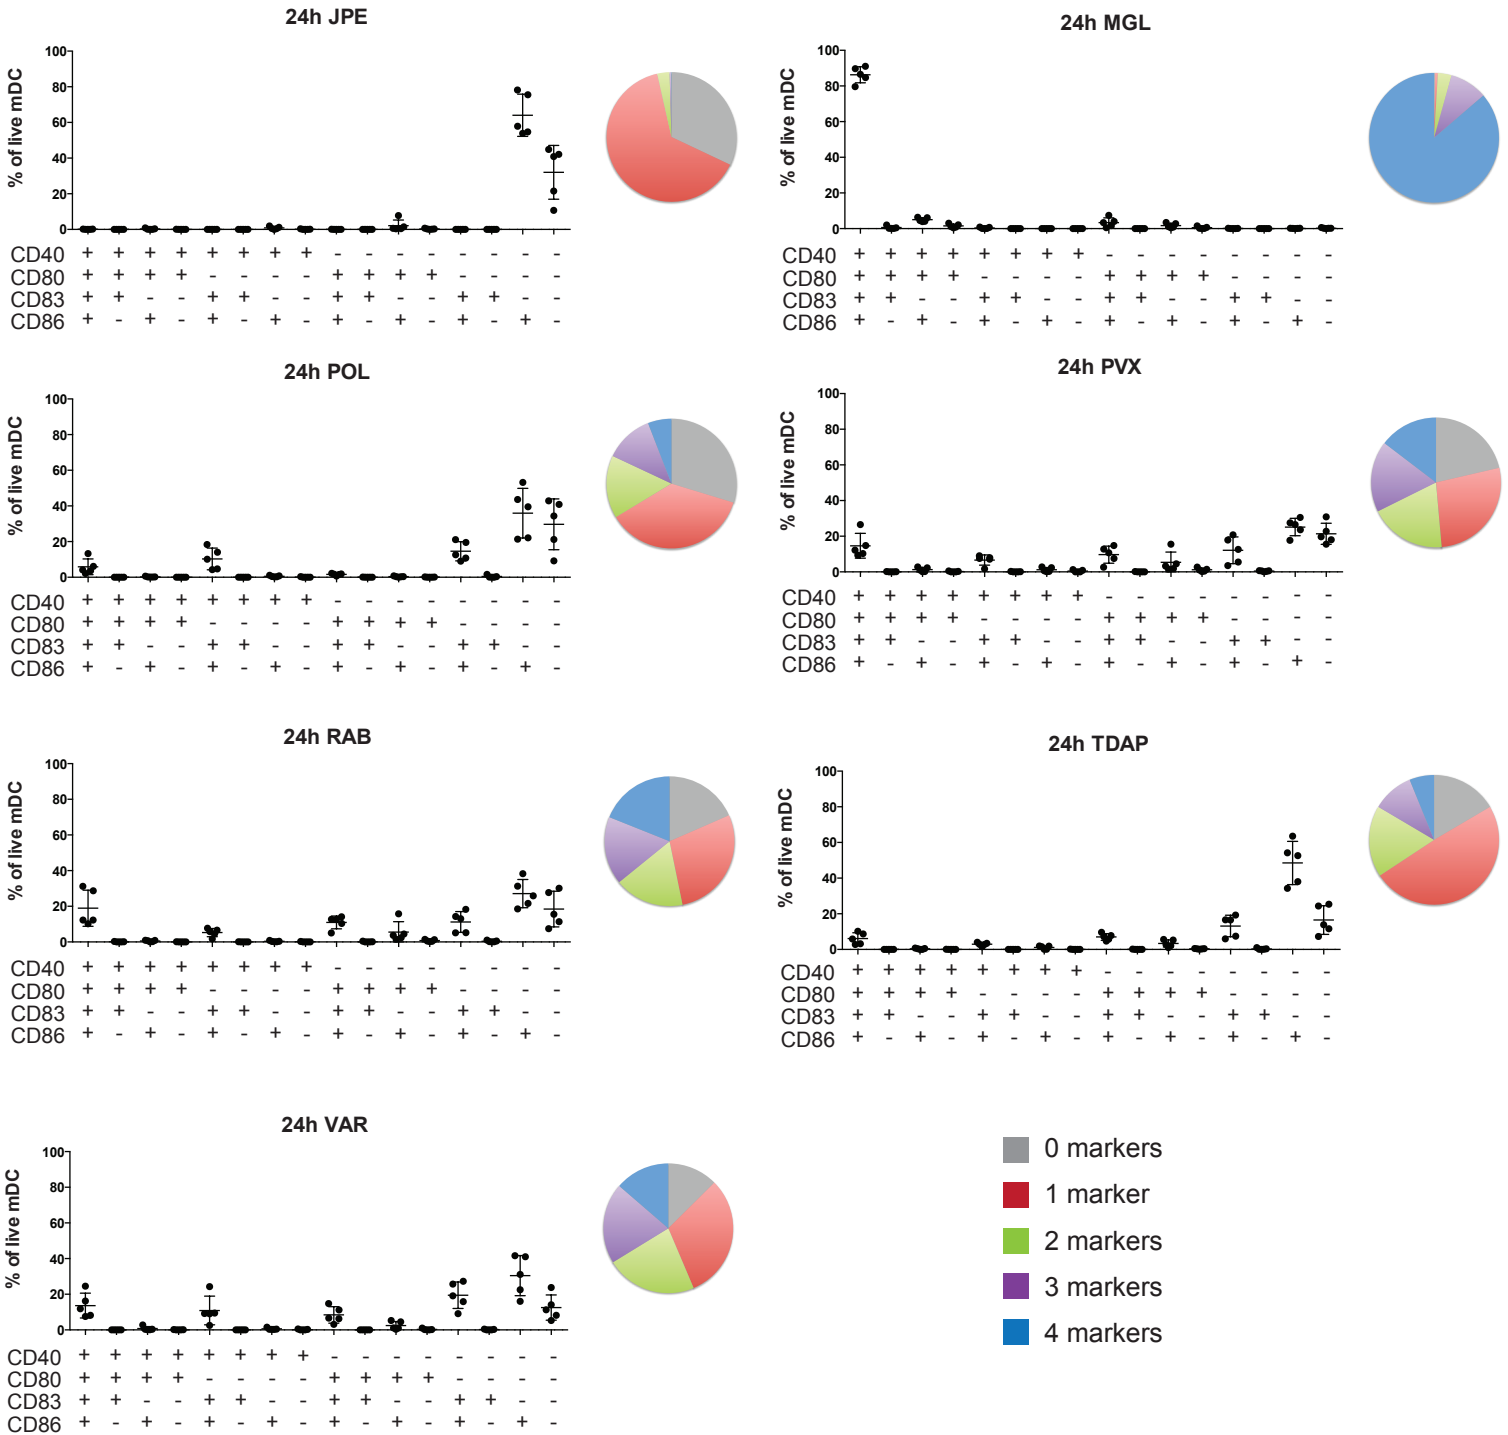

**Supplementary Figure 10** - Activation markers induced by vaccines in CD1c+ mDC after 24h stimulation. Boolean gating representing the expression of CD40, CD80, CD83 and CD86 for 5 healthy donors. Pie charts represent the proportion of live mDC expressing 0, 1, 2, 3 or all 4 activation markers.

a.

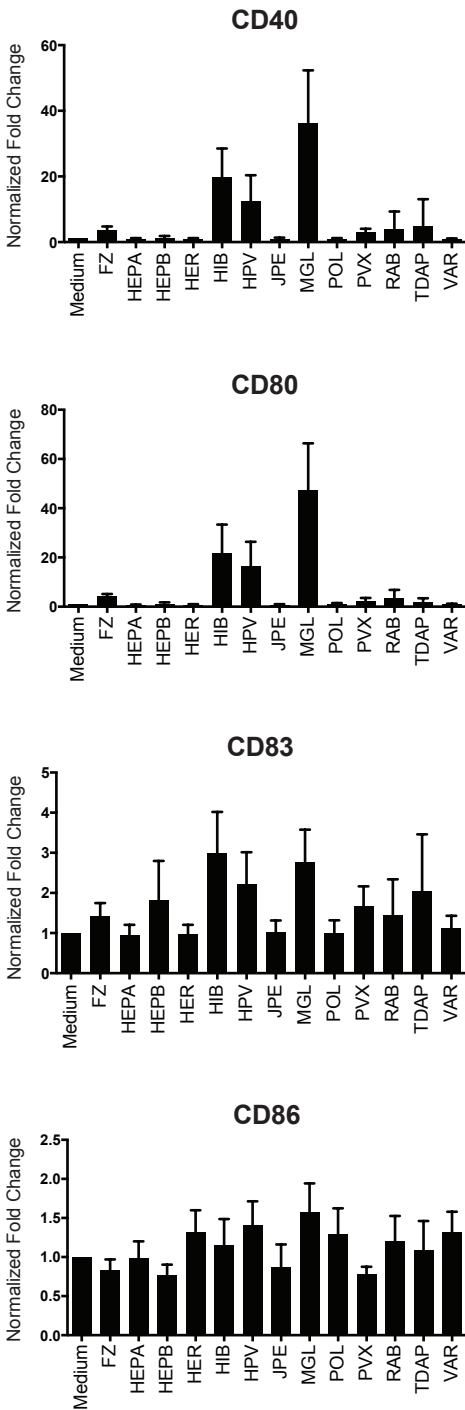

b.

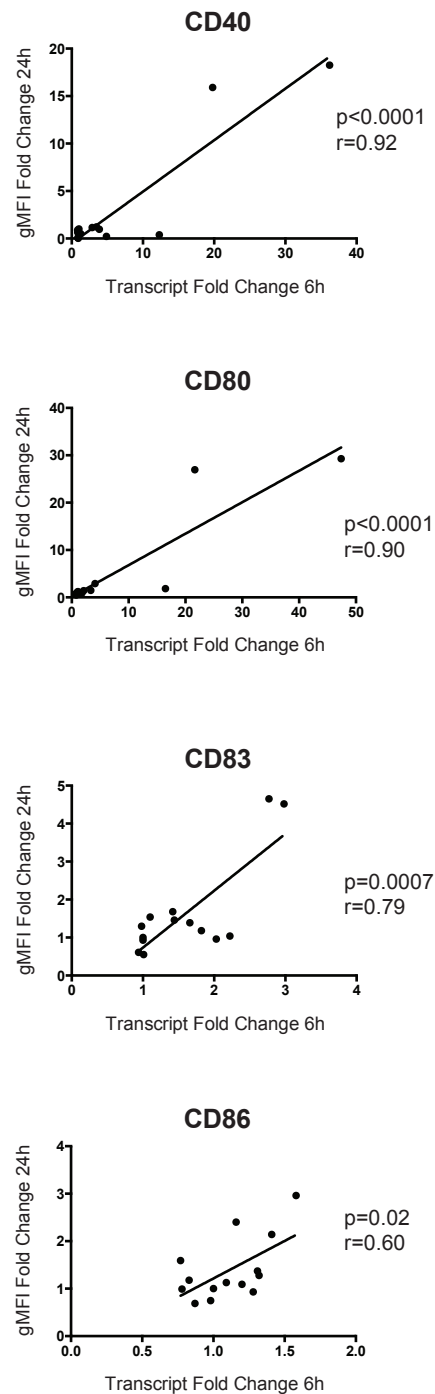

**Supplementary Figure 11 - Changes in CD1c+ mDC maturation markers at 24h in response to vaccines correlate with changes in transcript expression at 6h. a.** Bar charts representing the normalized fold change of CD40, CD80, CD83 and CD86 transcripts as compared to 6h medium for 5 donors. Error bars represent the standard deviation. **b.** X-Y charts representing the transcript fold change on the X-axis (normalized to 6h medium) and the change in gMFI measured by FACS at 24h (normalized to 24h medium) for the four markers. Linear regression lines were drawn and correlations were calculated (Pearson).

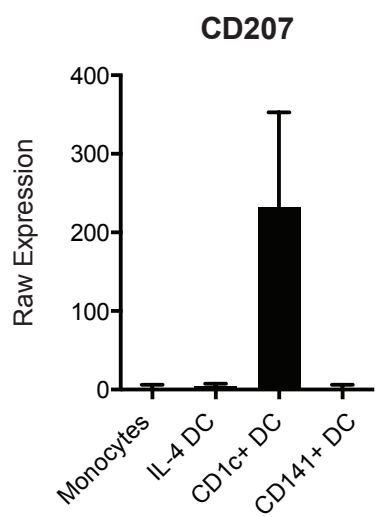

**Supplementary Figure 12** - Raw transcriptional expression of langerin (CD207) in APC subsets

**a.**

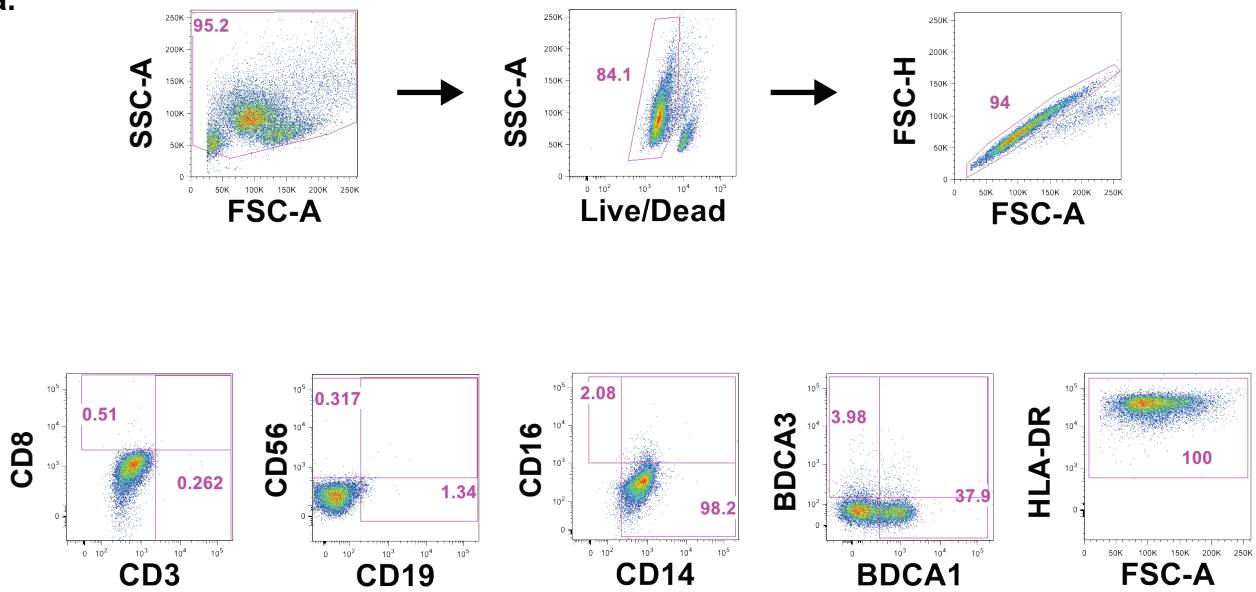

**b.**

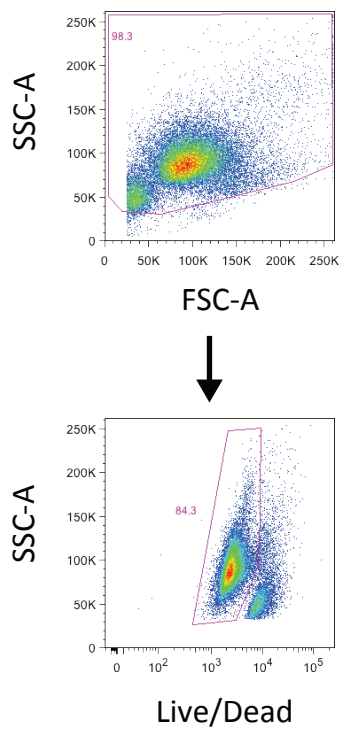

**c.**

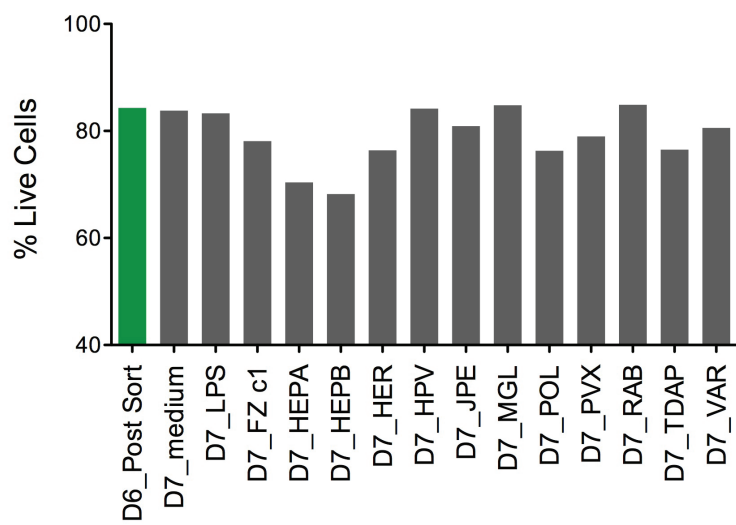

**Supplementary Figure 13** - IL-4 DC purity panel and viability analyses. **a.** Purity panel. **b.** Gating on viability dye. **c.** Viability of IL-4 DC stimulated for 24h with vaccines

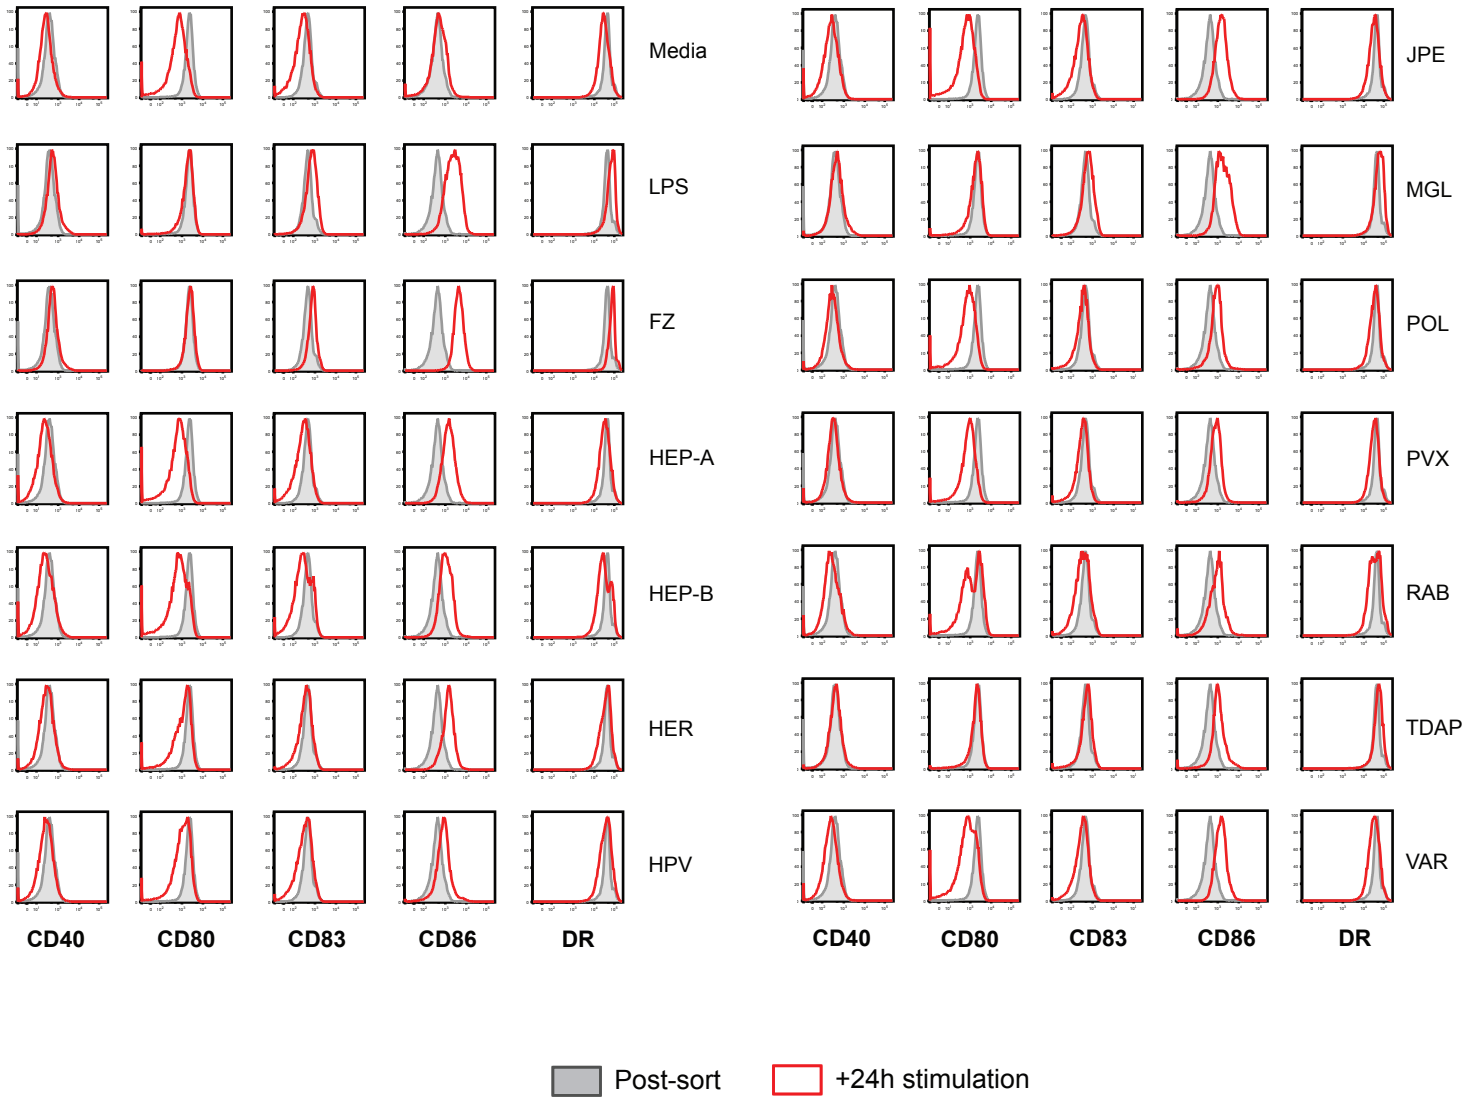

**Supplementary Figure 14** - Induction of surface maturation markers CD40, CD80, CD83, CD86 and HLA-DR in IL-4 DC stimulated with vaccines for 24h



**Supplementary Table 1 - Module Annotations**

| #  | Module ID | Annotation                                      | Round | Column | Transcripts Count |
|----|-----------|-------------------------------------------------|-------|--------|-------------------|
| 1  | M14.1     |                                                 | 14    | 1      | 15                |
| 2  | M16.1     | Inflammatory response (IL1B/IL8/NFKBIZ/CCLs)    | 16    | 1      | 16                |
| 3  | M18.1     | IL10-induced                                    | 18    | 1      | 18                |
| 4  | M18.2     | CD1 Family/C-type Lectins (CD1s/ASGPR /CLEC10A) | 18    | 2      | 16                |
| 5  | M19.1     | IFN Response (STAT1/OAS)                        | 19    | 1      | 15                |
| 6  | M19.2     | IL10-induced (CTSB)                             | 19    | 2      | 15                |
| 7  | M20.1     |                                                 | 20    | 1      | 19                |
| 8  | M20.2     | IFN-gamma response (IRF1/CD40/TRAF1)            | 20    | 2      | 18                |
| 9  | M21.1     |                                                 | 21    | 1      | 22                |
| 10 | M21.2     | Chemokines/FcRs                                 | 21    | 2      | 16                |
| 11 | M22.1     |                                                 | 22    | 1      | 20                |
| 12 | M22.2     | IFN Response/Antigen processing                 | 22    | 2      | 16                |
| 13 | M22.3     | Inflammatory response (NFKB2/EBI3/SERPINA1)     | 22    | 3      | 16                |
| 14 | M23.1     |                                                 | 23    | 1      | 23                |
| 15 | M24.1     |                                                 | 24    | 1      | 26                |
| 16 | M24.2     |                                                 | 24    | 2      | 20                |
| 17 | M24.3     | Inflammatory Response (NFKB2/SERPINB1)          | 24    | 3      | 19                |
| 18 | M24.4     | IFN Response (IFI44/IFITs/DHX58)                | 24    | 4      | 17                |
| 19 | M25.1     | IL1b/TNFa/IL15-induced (STAT4/IL4R)             | 25    | 1      | 23                |
| 20 | M25.2     |                                                 | 25    | 2      | 17                |
| 21 | M25.3     |                                                 | 25    | 3      | 15                |
| 22 | M25.4     |                                                 | 25    | 4      | 15                |
| 23 | M26.1     |                                                 | 26    | 1      | 25                |
| 24 | M26.2     | Inflammatory response (IL1A/IL6/IL8/CCLs)       | 26    | 2      | 17                |
| 25 | M26.3     |                                                 | 26    | 3      | 16                |
| 26 | M26.4     | IFN Response (IRF7/IP-10)                       | 26    | 4      | 16                |
| 27 | M26.5     |                                                 | 26    | 5      | 15                |
| 28 | M27.1     |                                                 | 27    | 1      | 18                |
| 29 | M27.2     |                                                 | 27    | 2      | 16                |
| 30 | M27.3     | T Cell activation/Regulation (CCL19/INDO/SOCS2) | 27    | 3      | 16                |
| 31 | M27.4     |                                                 | 27    | 4      | 15                |
| 32 | M28.1     | IFN-gamma response                              | 28    | 1      | 19                |
| 33 | M28.2     | IFN-gamma response (SLAMF1/WARS)                | 28    | 2      | 17                |
| 34 | M28.3     |                                                 | 28    | 3      | 17                |
| 35 | M28.4     |                                                 | 28    | 4      | 17                |
| 36 | M29.1     | IFN response (CD38/IFI35/UBE2L6)                | 29    | 1      | 26                |
| 37 | M29.2     |                                                 | 29    | 2      | 20                |
| 38 | M29.3     |                                                 | 29    | 3      | 18                |
| 39 | M29.4     |                                                 | 29    | 4      | 18                |
| 40 | M29.5     |                                                 | 29    | 5      | 16                |
| 41 | M29.6     |                                                 | 29    | 6      | 15                |
| 42 | M29.7     | DC maturation (CD83/EBI2/STAT5A)                | 29    | 7      | 15                |
| 43 | M29.8     | IFN-gamma Response                              | 29    | 8      | 15                |
| 44 | M29.9     | Inflammation/Inflammasome (NLRP3/MMP10)         | 29    | 9      | 15                |
| 45 | M30.1     |                                                 | 30    | 1      | 26                |
| 46 | M30.2     |                                                 | 30    | 2      | 23                |
| 47 | M30.3     |                                                 | 30    | 3      | 21                |
| 48 | M30.4     |                                                 | 30    | 4      | 18                |

|     |        |                                                          |    |    |    |
|-----|--------|----------------------------------------------------------|----|----|----|
| 49  | M30.5  |                                                          | 30 | 5  | 17 |
| 50  | M30.6  |                                                          | 30 | 6  | 15 |
| 51  | M31.1  | Inflammation regulation (IL10/LILRA3/IL1RN)              | 31 | 1  | 26 |
| 52  | M31.2  | STAT3 / MHC Class I                                      | 31 | 2  | 22 |
| 53  | M31.3  | IL10-induced - CTSA/RNASE4                               | 31 | 3  | 21 |
| 54  | M31.4  |                                                          | 31 | 4  | 19 |
| 55  | M31.5  |                                                          | 31 | 5  | 18 |
| 56  | M31.6  |                                                          | 31 | 6  | 15 |
| 57  | M32.1  |                                                          | 32 | 1  | 38 |
| 58  | M32.10 | Small Nuclear RNAs                                       | 32 | 10 | 17 |
| 59  | M32.11 | Type I IFN Response (STAT1/STAT2/OTOF)                   | 32 | 11 | 15 |
| 60  | M32.2  |                                                          | 32 | 2  | 33 |
| 61  | M32.3  |                                                          | 32 | 3  | 25 |
| 62  | M32.4  | Inflammatory response (PLAUR/CD44/CXCL5)                 | 32 | 4  | 24 |
| 63  | M32.5  |                                                          | 32 | 5  | 21 |
| 64  | M32.6  |                                                          | 32 | 6  | 21 |
| 65  | M32.7  | JAK-STAT signaling (JAK1/RELB/RUNX3)                     | 32 | 7  | 20 |
| 66  | M32.8  |                                                          | 32 | 8  | 19 |
| 67  | M32.9  |                                                          | 32 | 9  | 19 |
| 68  | M33.1  | Antiviral Response (APOBEC3G/TBK1/NFKBIE)                | 33 | 1  | 35 |
| 69  | M33.10 | Inflammation/IFN Response (F3/CCL8/TRIF)                 | 33 | 10 | 19 |
| 70  | M33.11 |                                                          | 33 | 11 | 19 |
| 71  | M33.12 |                                                          | 33 | 12 | 17 |
| 72  | M33.13 |                                                          | 33 | 13 | 15 |
| 73  | M33.14 | Hypothetical/Ribosomal Proteins                          | 33 | 14 | 15 |
| 74  | M33.15 |                                                          | 33 | 15 | 15 |
| 75  | M33.2  |                                                          | 33 | 2  | 31 |
| 76  | M33.3  | Inflammatory Response (NFKB1/TNF/CD40/IL27)              | 33 | 3  | 29 |
| 77  | M33.4  |                                                          | 33 | 4  | 27 |
| 78  | M33.5  |                                                          | 33 | 5  | 25 |
| 79  | M33.6  |                                                          | 33 | 6  | 25 |
| 80  | M33.7  |                                                          | 33 | 7  | 22 |
| 81  | M33.8  | IFN Response (IL15)                                      | 33 | 8  | 20 |
| 82  | M33.9  |                                                          | 33 | 9  | 19 |
| 83  | M34.1  |                                                          | 34 | 1  | 44 |
| 84  | M34.10 | Hypothetical Proteins (LOCs)                             | 34 | 10 | 20 |
| 85  | M34.11 | Macrophage differentiation (FCGR2A/SIRPA)                | 34 | 11 | 18 |
| 86  | M34.12 |                                                          | 34 | 12 | 17 |
| 87  | M34.13 | IL10-induced                                             | 34 | 13 | 16 |
| 88  | M34.14 | DC Activation/Maturation (CD86/IL7R/TNFSF13B)            | 34 | 14 | 15 |
| 89  | M34.2  |                                                          | 34 | 2  | 38 |
| 90  | M34.3  |                                                          | 34 | 3  | 36 |
| 91  | M34.4  |                                                          | 34 | 4  | 36 |
| 92  | M34.5  | DC Maturation/T Cell Activation (CD86/CD70)              | 34 | 5  | 25 |
| 93  | M34.6  |                                                          | 34 | 6  | 24 |
| 94  | M34.7  | Regulation/Cholesterol metabolism (IL2RA/LDLR/TFPI)      | 34 | 7  | 21 |
| 95  | M34.8  |                                                          | 34 | 8  | 20 |
| 96  | M34.9  |                                                          | 34 | 9  | 20 |
| 97  | M35.1  |                                                          | 35 | 1  | 52 |
| 98  | M35.10 | ERK Signaling/Regulation/Hypoxia (IRAK3/LAIR1/FCRER1A/CA | 35 | 10 | 21 |
| 99  | M35.11 |                                                          | 35 | 11 | 20 |
| 100 | M35.12 |                                                          | 35 | 12 | 19 |
| 101 | M35.13 | IL12 signaling (IL12A/CASP7/PVR)                         | 35 | 13 | 18 |

|     |        |                                                |    |    |     |
|-----|--------|------------------------------------------------|----|----|-----|
| 102 | M35.14 |                                                | 35 | 14 | 18  |
| 103 | M35.15 |                                                | 35 | 15 | 17  |
| 104 | M35.16 |                                                | 35 | 16 | 16  |
| 105 | M35.17 | NFKB Signaling (TANK/ID2)                      | 35 | 17 | 15  |
| 106 | M35.2  |                                                | 35 | 2  | 42  |
| 107 | M35.3  | Hypothetical/Ribosomal Proteins                | 35 | 3  | 39  |
| 108 | M35.4  | IFN Response (IL15/OAS2)                       | 35 | 4  | 30  |
| 109 | M35.5  | Inflammation/Apoptosis (CSFs/IL10/CASPs/TLR4)  | 35 | 5  | 30  |
| 110 | M35.6  |                                                | 35 | 6  | 28  |
| 111 | M35.7  |                                                | 35 | 7  | 24  |
| 112 | M35.8  | Inflammasome (NLRP3/MMP19/SERPINBs)            | 35 | 8  | 23  |
| 113 | M35.9  | Hypothetical Proteins (LOCs)                   | 35 | 9  | 23  |
| 114 | M36.1  |                                                | 36 | 1  | 86  |
| 115 | M36.10 | Histones / Adhesion / Lipid Rafts (CD44)       | 36 | 10 | 23  |
| 116 | M36.11 |                                                | 36 | 11 | 21  |
| 117 | M36.12 | Inflammasome (LILRA5/P2RX7/CLIC4)              | 36 | 12 | 21  |
| 118 | M36.13 |                                                | 36 | 13 | 18  |
| 119 | M36.14 | Mitochondrial Proteins                         | 36 | 14 | 18  |
| 120 | M36.15 |                                                | 36 | 15 | 17  |
| 121 | M36.16 |                                                | 36 | 16 | 17  |
| 122 | M36.17 |                                                | 36 | 17 | 17  |
| 123 | M36.18 |                                                | 36 | 18 | 15  |
| 124 | M36.19 |                                                | 36 | 19 | 15  |
| 125 | M36.2  |                                                | 36 | 2  | 38  |
| 126 | M36.3  |                                                | 36 | 3  | 35  |
| 127 | M36.4  | Translation/Ribosomal proteins                 | 36 | 4  | 35  |
| 128 | M36.5  |                                                | 36 | 5  | 31  |
| 129 | M36.6  |                                                | 36 | 6  | 31  |
| 130 | M36.7  |                                                | 36 | 7  | 29  |
| 131 | M36.8  | Hypothetical/Ribosomal proteins (LOCs)         | 36 | 8  | 27  |
| 132 | M36.9  |                                                | 36 | 9  | 25  |
| 133 | M37.1  |                                                | 37 | 1  | 132 |
| 134 | M37.10 |                                                | 37 | 10 | 27  |
| 135 | M37.11 | Ribosomal proteins                             | 37 | 11 | 27  |
| 136 | M37.12 | Macrophage differentiation (MARCO/ILT3)        | 37 | 12 | 25  |
| 137 | M37.13 |                                                | 37 | 13 | 24  |
| 138 | M37.14 |                                                | 37 | 14 | 22  |
| 139 | M37.15 | Antiviral response (APOBEC3F/TRIMs)            | 37 | 15 | 22  |
| 140 | M37.16 | ATP Synthases /Ribosomal Proteins              | 37 | 16 | 22  |
| 141 | M37.17 | Hypoxia (HIF1A/CASP1)                          | 37 | 17 | 20  |
| 142 | M37.18 | IFN Response (IFNB1/UBE2E1)                    | 37 | 18 | 19  |
| 143 | M37.19 |                                                | 37 | 19 | 17  |
| 144 | M37.2  | Inflammatory response (RELA/JUN/MMPs/SERPINB4) | 37 | 2  | 69  |
| 145 | M37.20 |                                                | 37 | 20 | 17  |
| 146 | M37.21 | Regulation of mRNA splicing                    | 37 | 21 | 16  |
| 147 | M37.22 |                                                | 37 | 22 | 16  |
| 148 | M37.3  |                                                | 37 | 3  | 56  |
| 149 | M37.4  | Hypothetical/Ribosomal proteins                | 37 | 4  | 42  |
| 150 | M37.5  |                                                | 37 | 5  | 38  |
| 151 | M37.6  |                                                | 37 | 6  | 37  |
| 152 | M37.7  |                                                | 37 | 7  | 33  |
| 153 | M37.8  | Antiviral response (RIG-I)                     | 37 | 8  | 33  |
| 154 | M37.9  | MHC Class I / Catenins / Tolerance / Motility  | 37 | 9  | 28  |

|     |        |                                             |    |    |     |
|-----|--------|---------------------------------------------|----|----|-----|
| 155 | M38.1  | Type III IFNs/Small RNAs/ZNFs               | 38 | 1  | 159 |
| 156 | M38.10 | Ferritin/FcGR2A                             | 38 | 10 | 24  |
| 157 | M38.11 | IFNa-induced                                | 38 | 11 | 23  |
| 158 | M38.12 | ER unfolded protein response                | 38 | 12 | 21  |
| 159 | M38.13 | Motility (CD81) / Ferritin                  | 38 | 13 | 20  |
| 160 | M38.14 |                                             | 38 | 14 | 19  |
| 161 | M38.15 |                                             | 38 | 15 | 18  |
| 162 | M38.16 |                                             | 38 | 16 | 17  |
| 163 | M38.17 |                                             | 38 | 17 | 17  |
| 164 | M38.18 |                                             | 38 | 18 | 15  |
| 165 | M38.2  |                                             | 38 | 2  | 136 |
| 166 | M38.3  |                                             | 38 | 3  | 59  |
| 167 | M38.4  |                                             | 38 | 4  | 54  |
| 168 | M38.5  |                                             | 38 | 5  | 43  |
| 169 | M38.6  |                                             | 38 | 6  | 36  |
| 170 | M38.7  | Ribosomal proteins                          | 38 | 7  | 29  |
| 171 | M38.8  | IRF8/Ribonucleoproteins                     | 38 | 8  | 27  |
| 172 | M38.9  |                                             | 38 | 9  | 24  |
| 173 | M39.1  |                                             | 39 | 1  | 307 |
| 174 | M39.10 |                                             | 39 | 10 | 44  |
| 175 | M39.11 |                                             | 39 | 11 | 37  |
| 176 | M39.12 |                                             | 39 | 12 | 35  |
| 177 | M39.13 | Ribosomal proteins/IFNs (IFNA13/IL28B)      | 39 | 13 | 34  |
| 178 | M39.14 | Macrophage differentiation (CD163/FcRs)     | 39 | 14 | 32  |
| 179 | M39.15 | Undetermined                                | 39 | 15 | 28  |
| 180 | M39.16 |                                             | 39 | 16 | 22  |
| 181 | M39.17 | Antiviral response/Ubiquitination (UNC93B1) | 39 | 17 | 19  |
| 182 | M39.18 |                                             | 39 | 18 | 19  |
| 183 | M39.19 |                                             | 39 | 19 | 18  |
| 184 | M39.2  |                                             | 39 | 2  | 121 |
| 185 | M39.3  | Migration/MHC Class II (CD63/CD82)          | 39 | 3  | 94  |
| 186 | M39.4  |                                             | 39 | 4  | 83  |
| 187 | M39.5  | Histones/Small Nucleolar RNAs/ZNFs          | 39 | 5  | 72  |
| 188 | M39.6  | Ribosomal proteins                          | 39 | 6  | 66  |
| 189 | M39.7  |                                             | 39 | 7  | 64  |
| 190 | M39.8  | Regulation/Suppression (ILT4/ILT11/DCR3)    | 39 | 8  | 53  |
| 191 | M39.9  |                                             | 39 | 9  | 46  |
| 192 | M40.1  |                                             | 40 | 1  | 177 |
| 193 | M40.10 | Regulatory/ERK (IL19/IL21R/PTP4A3)          | 40 | 10 | 20  |
| 194 | M40.11 | TLR2/MYC/RAS signaling                      | 40 | 11 | 18  |
| 195 | M40.12 | IFNa-induced                                | 40 | 12 | 15  |
| 196 | M40.13 | Tissue infiltration (GITR)                  | 40 | 13 | 15  |
| 197 | M40.2  |                                             | 40 | 2  | 141 |
| 198 | M40.3  |                                             | 40 | 3  | 120 |
| 199 | M40.4  | Histones/Ribosomal proteins                 | 40 | 4  | 40  |
| 200 | M40.5  | Histones/Small Nucleolar RNAs               | 40 | 5  | 36  |
| 201 | M40.6  |                                             | 40 | 6  | 30  |
| 202 | M40.7  | Ribosomal proteins                          | 40 | 7  | 29  |
| 203 | M40.8  |                                             | 40 | 8  | 26  |
| 204 | M40.9  | IFN Response (IFNA7/OAS2)                   | 40 | 9  | 25  |

**Supplementary Table 2 - 11 clusters of modules identified by SOTA**

| Cluster # | Cluster Annotation                                                                               | Module ID | Module Annotation                                      |
|-----------|--------------------------------------------------------------------------------------------------|-----------|--------------------------------------------------------|
| SC1       | Interferon Response<br>Antiviral Response / IFNa DC<br>only                                      | M37.15    | Antiviral Response - APOBEC3F/TRIMs/TAP2               |
|           |                                                                                                  | M32.11    | IFN Response - STAT1/STAT2/OTOF                        |
|           |                                                                                                  | M40.12    | IFNa-induced                                           |
|           |                                                                                                  | M40.9     | IFN Response - IFNA7/OAS2/SP140                        |
|           |                                                                                                  | M38.11    | IFNa-induced                                           |
|           |                                                                                                  | M39.17    | Antiviral/Ubiquitination - UNC93B1/SP110               |
| SC2       | Interferon Response<br>Antiviral & Antibacterial / IFNa<br>and IL-4 DC                           | M24.4     | IFN Response - IFI44/IFITs/DHX58                       |
|           |                                                                                                  | M26.4     | IFN Response - IRF7/IP-10                              |
|           |                                                                                                  | M19.1     | IFN Response - STAT1/OAS                               |
|           |                                                                                                  | M22.2     | IFN Response / Antigen Processing                      |
| SC3       | Ribosomal Proteins / Histones<br>Antiviral / IL-4 DC only                                        | M32.10    | Small Nuclear RNAs                                     |
|           |                                                                                                  | M37.11    | Ribosomal Proteins                                     |
|           |                                                                                                  | M39.13    | Ribosomal Proteins / IFNs - IFNA13 / IL28B             |
|           |                                                                                                  | M38.7     | Ribosomal Proteins                                     |
|           |                                                                                                  | M40.4     | Histones / Ribosomal Proteins                          |
|           |                                                                                                  | M40.7     | Ribosomal Proteins                                     |
| SC4       | Histones / Type III Interferons<br>Antiviral / IL-4 DC only                                      | M34.10    |                                                        |
|           |                                                                                                  | M36.4     | Transcription/Translation - Ribosomal Proteins         |
|           |                                                                                                  | M38.1     | Type III IFNs/Small RNAs/ZNFs                          |
|           |                                                                                                  | M39.5     | Histones/Small Nucleolar RNAs/ZNFs                     |
|           |                                                                                                  | M40.5     | Histones/Small Nucleolar RNAs                          |
| SC5       | Motility / Glycolipids / Antigen<br>Presentation<br><br>Late Antibacterial / IFNa and IL-4<br>DC | M36.18    |                                                        |
|           |                                                                                                  | M37.5     |                                                        |
|           |                                                                                                  | M38.10    | Ferritin/FcGR2A                                        |
|           |                                                                                                  | M35.11    |                                                        |
|           |                                                                                                  | M37.9     | MHC Class I / Catenins / Tolerance / Motility          |
|           |                                                                                                  | M38.13    | Motility (CD81) / Ferritin                             |
|           |                                                                                                  | M34.7     | Regulation/Cholesterol metabolism - IL2RA/LDLR/TFPI    |
|           |                                                                                                  | M36.10    | Histones / Adhesion / Lipid Rafts (CD44)               |
|           |                                                                                                  | M37.2     | Inflammatory Response - RELA / JUN / MMPs / SERPINB4   |
|           |                                                                                                  | M39.3     | Migration / MHC Class II (CD63 / CD82)                 |
| SC6       | ERK Signaling / Macrophages<br>Late Antibacterial / IFNa and IL-4<br>DC                          | M38.18    |                                                        |
|           |                                                                                                  | M40.6     |                                                        |
|           |                                                                                                  | M32.4     | Inflammatory Response - PLAUR/CD44/CXCL5               |
|           |                                                                                                  | M35.10    | ERK Signaling/Regulation/Hypoxia - IRAK3/LAIR1/FCRER1A |
| SC7       | Macrophage Differentiation<br>Late Antibacterial / IL-4 DC only                                  | M40.13    | Tissue infiltration - GITR                             |
|           |                                                                                                  | M34.11    | Macrophage differentiation - FCGR2A/SIRPA              |
|           |                                                                                                  | M29.2     |                                                        |
| SC8       | Maturation / T Cell Activation<br>Late Antibacterial / IFNa and IL-4<br>DC                       | M40.8     |                                                        |
|           |                                                                                                  | M39.14    | Macrophage differentiation - CD163/FcRs                |
|           |                                                                                                  | M25.1     | IL1b TNFa IL15-induced - STAT4/IL4R/LILRA3             |
|           |                                                                                                  | M27.3     | T Cell Activation/Tolerance - CCL19/INDO/CD274/SOCS2   |
|           |                                                                                                  | M29.1     | IFN Response - CD38/IFI35/UBE2L6                       |
|           |                                                                                                  | M28.1     |                                                        |
|           |                                                                                                  | M31.2     | STAT3 / MHC Class I                                    |
|           |                                                                                                  | M32.7     | JAK1/RELB/RUNX3                                        |
|           |                                                                                                  | M33.1     | Antiviral Response - APOBEC3G/TBK1/NFKBIE              |
| SC8       | Late Antibacterial / IFNa and IL-4<br>DC                                                         | M34.5     | DC Maturation/T Cell Activation - CD86/CD70            |
|           |                                                                                                  | M35.13    | IL12A/CASP7/PVR                                        |

|       |                                                                             |        |                                                     |
|-------|-----------------------------------------------------------------------------|--------|-----------------------------------------------------|
|       | DC                                                                          | M37.12 | Macrophage differentiation - MARCO/ILT3             |
|       |                                                                             | M39.7  |                                                     |
|       |                                                                             | M35.4  | IFN Response - IL15/OAS2                            |
|       |                                                                             | M37.13 |                                                     |
|       |                                                                             | M36.13 |                                                     |
|       |                                                                             | M39.18 |                                                     |
|       |                                                                             | M39.9  |                                                     |
| SC9   | Inflammation / Interferon Response<br>Early Antibacterial / IL-4 DC only    | M38.14 |                                                     |
|       |                                                                             | M40.11 | TLR2/MYC/RAS signaling                              |
|       |                                                                             | M29.9  | Inflammatory Response - NLRP3/MMP10/SERPINB2        |
|       |                                                                             | M35.8  | Inflammatory Response - NLRP3/MMP19/SERPINBs        |
|       |                                                                             | M37.8  | Antiviral - RIG-I                                   |
|       |                                                                             | M39.12 |                                                     |
| SC10  | Inflammation / Regulation<br>Early Antibacterial / IFN $\alpha$ and IL-4 DC | M37.18 | IFN Response - IFNB1/UBE2E1                         |
|       |                                                                             | M39.8  | Regulation/Suppression - ILT4/ILT11/DCR3            |
|       |                                                                             | M33.3  | Inflammatory Response - NFKB1/TNF/CD40/IL27         |
|       |                                                                             | M34.14 | DC Activation/Maturation - CD86/IL7R/HLA-F/TNFSF13B |
|       |                                                                             | M36.12 | Inflammasome-related - LILRA5/P2RX7/SOCS3/CLIC4     |
|       |                                                                             | M38.12 |                                                     |
|       |                                                                             | M33.8  | IFN Response - IL15                                 |
|       |                                                                             | M33.10 | Inflammatory/IFN Response - F3/CCL8/TRIF            |
| SC11  | Inflammation / Regulation<br>Early Antibacterial / IFN $\alpha$ and IL-4 DC | M37.17 | Hypoxia/Apoptosis - HIF1A/CASP1                     |
|       |                                                                             | M35.5  | Inflammation/Apoptosis - CSFs/IL10/CASPs/TLR4       |
|       |                                                                             | M39.15 |                                                     |
|       |                                                                             | M38.8  | IRF8/Ribonucleoproteins                             |
|       |                                                                             | M40.10 | Regulatory/ERK - IL19/IL21R/PTP4A3                  |
|       |                                                                             | M16.1  | Inflammatory Response - IL1B/IL8/NFKBIZ/CCLs        |
|       |                                                                             | M26.2  | Inflammatory Response - IL1A/IL6/IL8/CCLs           |
|       |                                                                             | M20.2  | IFN-gamma Response - IRF1/CD40/TRAF1                |
|       |                                                                             | M24.3  | Inflammatory Response - NFKB2/SERPINAB1/TNFAIP2     |
|       |                                                                             | M29.7  | CD83/EBI2/STAT5A                                    |
|       |                                                                             | M29.8  | IFN-gamma Response                                  |
|       |                                                                             | M35.17 | NFKB Signaling - TANK/ID2                           |
|       |                                                                             | M31.1  | Inflammation Regulation - IL10/LILRA3/IL1RN         |
| M28.2 | SLAMF1/TNFRSF1B/WARS                                                        |        |                                                     |
| M22.3 | Inflammatory Response - NFKB2/EBI3/SERPINA1                                 |        |                                                     |
|       |                                                                             | M37.21 |                                                     |

**Supplementary Table 3 - Stimuli Summary**

| Category                            | Ligand                         | Category                                    | Source          | Dose                | Target      |
|-------------------------------------|--------------------------------|---------------------------------------------|-----------------|---------------------|-------------|
| TLR Ligands & Cytoplasmic Receptors | PAM3-CSK4                      | Bacterial cell wall component               | Invivogen       | 200ng/mL            | TLR1/2      |
|                                     | Poly I:C                       | Synthetic analog of dsRNA                   | Invivogen       | 10ug/mL             | TLR3        |
|                                     | LPS                            | Gram-negative bacterial cell wall component | Invivogen       | 100ng/mL            | TLR4        |
|                                     | Flagellin                      | Bacterial cell wall component               | Invivogen       | 100ng/mL            | TLR5        |
|                                     | R837                           | Small synthetic antiviral molecule          | Invivogen       | 10ug/mL             | TLR7        |
|                                     | R848                           | Small synthetic antiviral molecule          | Invivogen       | 3ug/mL              | TLR7/8      |
|                                     | CL097                          | Small synthetic antiviral molecule          | Invivogen       | 5ug/mL              | TLR7/8      |
|                                     | CpG 2006                       | Synthetic oligonucleotide                   | Invivogen       | 1uM                 | TLR9        |
|                                     | CpG 2216                       | Synthetic oligonucleotide                   | Invivogen       | 1uM                 | TLR9        |
|                                     | MDP                            | Bacterial cell wall component               | Invivogen       | 10ug/mL             | NOD2        |
|                                     | Poly I:C-LMW-Lyovec            | Synthetic analog of dsRNA                   | Invivogen       | 1ug/mL              | RIG-I       |
| Cytokines                           | IL-1b                          | Recombinant Cytokine                        | BIIR            | 100ng/mL            | IL1R        |
|                                     | IL-10                          | Recombinant Cytokine                        | Peprtech        | 100ng/mL            | IL10R       |
|                                     | IL-15                          | Recombinant Cytokine                        | Peprtech        | 100ng/mL            | IL15R       |
|                                     | IL-21                          | Recombinant Cytokine                        | Invitrogen      | 100ng/mL            | IL21R       |
|                                     | TNFa                           | Recombinant Cytokine                        | R&D             | 50ng/mL             | TNFAR       |
|                                     | IFNa                           | Recombinant Cytokine                        | Schering-Plough | 500U/mL             | IFNAR       |
| Pathogens                           | Influenza H1N1 Brisbane        | Virus                                       | In house (BIIR) | MOI 5:1             | TLR3/TLR7 ? |
|                                     | Heat-killed <i>S. enterica</i> | Gram-negative bacteria                      | In house (BIIR) | 10 <sup>8</sup> /mL | TLR4 / ?    |
|                                     | Heat-killed <i>S. aureus</i>   | Gram-positive bacteria                      | Invivogen       | 10 <sup>8</sup> /mL | TLR2 / ?    |
